# Supplementary material
Source: Springer Nature journal article supplement (https://www.springermedizin.de/resource/supplementary/12889_2013_5660_MOESM1_ESM.pdf/9495960)
Supplement: MOESM1 [file 9495960]

*Pre-existing mental model*

Testing HIV-positive = HIV-infected

"No one wants to have HIV"

*Assumption 1*

*Fear of VISP*

"If a vaccine makes me test HIV-positive, it means I have HIV"

*Assumption 2*

*Anxiety about VISP*

"If I test HIV-positive, I will worry that I really have HIV...even if trial staff tell me I do not have HIV"

*Assumption 3*

*Omission bias & anticipatory regret*

"I've worked hard to avoid HIV all my life by not having unprotected sex. If I contract HIV due to participating in a trial, it would be worse than getting HIV from not using a condom"

*Intervention strategy*

Explain and show potential volunteers PCR test examples that will be used to 'prove' that someone with VISP is not HIV-infected

*Intervention strategy*

Educate MSM about VISP using 'false-positive HIV antibody-based test' as an example. Explain that fragments (natural or synthetic) of HIV cannot possibly cause HIV infection

*New mental model*

**Participating in an HIV Vaccine Trial May Cause HIV Infection**

"I will be placed at risk for HIV infection by the trial vaccine"

*Challenge*

Even if MSM understand VISP, family members and the general public will not understand, which may lead to relationship problems with male and female partners; alienate family; and pose obstacles for overseas work visas

*Intervention strategy*

Engage male and female partners in trial education sessions if participant desires; skill-building for trial volunteers to discuss VISP with significant others; availability of trial ombudsperson to intervene in difficult cases

*Alternative mental model*

"False-positive" HIV test result  
"One can test HIV-positive at the hospital/clinic, but not really be HIV-infected"
